# Supplementary material
Source: PubMed Central journal article supplement (PMC4114174)
Supplement: supp_WNL.0000000000000537_Tables-Figures.pdf [file supp_WNL.0000000000000537_Tables-Figures.pdf]

## SUPPLEMENTAL TABLES

**Table e-1: Demographic data and baseline diagnosis for hospitalization**

| <b>Baseline data for all patients and patients with seizures</b> |                                 |                                          |
|------------------------------------------------------------------|---------------------------------|------------------------------------------|
|                                                                  | <b>All patients<br/>(n=118)</b> | <b>Patients with seizures<br/>(n=40)</b> |
| <b>Age, mean ± SD (range)</b>                                    | 59.9 ± 18.37 (19-95)            | 59.5 ± 18.43 (23-88)                     |
| <b>Male</b>                                                      | 62 (52.5%)                      | 20 (50%)                                 |
| <b>ICU</b>                                                       | 71 (60.2%)                      | 20 (50%)                                 |
| <b>ICH</b>                                                       | 22 (18.6%)                      | 6 (15.0%)                                |
| <b>Ischemic stroke</b>                                           | 8 (6.8%)                        | 1 (2.5%)                                 |
| <b>TBI</b>                                                       | 10 (8.5%)                       | 2 (5.0%)                                 |
| <b>CNS tumor</b>                                                 | 14 (11.9%)                      | 6 (15.0%)                                |
| <b>CNS infection</b>                                             | 8 (6.8%)                        | 2 (5.0%)                                 |
| <b>Hypoxic-ischemic injury</b>                                   | 8 (6.8%)                        | 4 (10.0%)                                |
| <b>Seizure disorder or spells</b>                                | 29 (24.6%)                      | 9 (22.5%)                                |
| <b>General medical disease</b>                                   | 17 (14.4%)                      | 8 (20%)                                  |
| <b>CNS autoimmune disease</b>                                    | 2 (1.7%)                        | 2 (5.0%)                                 |

Legend: Abbreviations: ICU = intensive care unit; ICH = intracranial hemorrhage; TBI = traumatic brain injury; CNS = central nervous system.

aValues are the number of patients (percentage patients) unless otherwise indicated.

**Table e-2: Time-savings detailed analysis**

|                                                         | Time Saving analysis     |                                                         |                     |                     |                                   |                                                                  |                     |                      |                                       |
|---------------------------------------------------------|--------------------------|---------------------------------------------------------|---------------------|---------------------|-----------------------------------|------------------------------------------------------------------|---------------------|----------------------|---------------------------------------|
|                                                         | CSA review<br>Reader A-C | CSA review - detail<br>Reader A<br>Reader B<br>Reader C |                     |                     | Conventional review<br>Reader A-C | Conventional review - detail<br>Reader A<br>Reader B<br>Reader C |                     |                      | Conventional review<br>Reader D and E |
| <b>Total studies</b>                                    | 118                      | 44                                                      | 37                  | 37                  | 115                               | 64                                                               | 8                   | 43                   | 118                                   |
| <b>Total studies with Seizures</b>                      | 40                       | 9                                                       | 18                  | 13                  | 37                                | 26                                                               | 4                   | 7                    | 40                                    |
| <b>Average duration time per cEEG (hours)</b>           | 17.73<br>(SD: 4.21)      | 17.91<br>(SD: 4.06)                                     | 18.02<br>(SD: 4.78) | 17.24<br>(SD: 3.71) | 17.78<br>(SD: 4.25)               | 17.74<br>(SD: 4.46)                                              | 17.03<br>(SD: 3.22) | 17.99<br>(SD: 4.07)  | 17.73<br>(SD:4.21)                    |
| <b>Mean time to review per cEEG</b>                     | 5.74<br>(SD:2.91)        | 6.07<br>(SD:2.75)                                       | 7.15<br>(SD:2.99)   | 3.93<br>(SD:1.91)   | 28.24<br>(SD: 13.11)              | 29.48 (SD: 14.81)                                                | 6.99 (SD: 3.28)     | 30.35 (SD: 6.37)     | 22.79<br>(SD:13.64)                   |
| <b>Mean time to review per cEEG with seizure</b>        | 5.06<br>(SD:2.05)        | 8.99<br>(SD:2.94)                                       | 9.18<br>(SD:2.88)   | 5.06<br>(SD:2.05)   | 34.46<br>(SD: 17.12)              | 38.23<br>(SD: 17.16)                                             | 8.40 (SD: 3.85)     | 35.14 (SD: 8.31)     | 33.53<br>(SD: 18.51)                  |
| <b>Mean time to review per cEEG without seizure</b>     | 3.32<br>(SD:1.50)        | 5.31<br>(SD:2.13)                                       | 5.23<br>(SD:1.40)   | 3.32<br>(SD:1.50)   | 25.05<br>(SD: 8.94)               | 23.50 (SD: 8.94)                                                 | 5.58 (SD: 1.66)     | 29.08 (SD: 5.04)     | 17.28<br>(SD: 4.04)                   |
| <b>Mean time to review per 24h of cEEG</b>              | 8<br>(SD: 4.03)          | 8.36<br>(SD: 3.90)                                      | 9.88<br>(SD: 3.97)  | 5.7<br>(SD: 2.98)   | 38.75<br>(SD: 17.13)              | 40.37<br>(SD: 18.85)                                             | 10.46<br>(SD: 5.95) | 41.6<br>(SD: 9.39)   | 31<br>(SD: 18.09)                     |
| <b>Mean time to review per 24h of cEEG with seizure</b> | 10.42<br>(SD: 4.37)      | 12.02<br>(SD: 4.09)                                     | 11.79<br>(SD: 4.06) | 7.41<br>(SD: 3.31)  | 44.58<br>(SD: 20.31)              | 48.66<br>(SD: 19.70))                                            | 12.72<br>(SD: 7.56) | 46.96<br>(SD: 11.70) | 44.65<br>(SD: 26.15)                  |

Legend: Abbreviations: CSA = compressed spectral array, cEEG = continuous EEG.

\*Time in minutes.

**Table e-3: Sensitivity analysis for seizures and other abnormal patterns in the CSA review group.**

| Sensitivity analysis for seizures and other abnormal patterns |                     |               |               |                              |               |                |
|---------------------------------------------------------------|---------------------|---------------|---------------|------------------------------|---------------|----------------|
|                                                               | CSA review – detail |               |               | Conventional review – detail |               |                |
|                                                               | Reader A            | Reader B      | Reader C      | Reader A                     | Reader B      | Reader C       |
| <b>Total studies</b>                                          | 44                  | 37            | 37            | 64                           | 8             | 43             |
| <b>Total studies with Seizures</b>                            | 9                   | 18            | 13            | 26                           | 4             | 7              |
| <b>Total patients with Seizures Identified</b>                | 9/9 (100%)          | 18/18 (100%)  | 13/13 (100%)  | 26/26 (100%)                 | 4/4 (100%)    | 7/7 (100%)     |
| <b>Total seizures identified / total seizures</b>             | 244/268 (91%)       | 536/622 (86%) | 268/311 (86%) | 742/743 (99%)                | 146/149 (97%) | 259/259 (100%) |
| <b>PDs</b>                                                    | 21/21 (100%)        | 12/12 (100%)  | 10/10 (100%)  | 21/21 (100%)                 | 1/1 (100%)    | 16/16 (100%)   |
| <b>RDA</b>                                                    | 12/12 (100%)        | 8/8 (100%)    | 14/15 (93.3%) | 19/19 (100%)                 | 3/4 (75%)     | 8/8 (100%)     |
| <b>FS</b>                                                     | 31/32 (96.8%)       | 22/22 (100%)  | 23/23 (100%)  | 31/38 (81%)                  | 5/5 (100%)    | 23/24 (95%)    |
| <b>GS</b>                                                     | 39/39 (100%)        | 33/33 (100%)  | 28/28 (100%)  | 54/54 (100%)                 | 6/6 (100%)    | 30/30 (100%)   |
| <b>ED</b>                                                     | 28/29 (96.5%)       | 11/19 (57.8%) | 22/22 (100%)  | 21/22 (95%)                  | 5/6 (83%)     | 22/22 (100%)   |

Legend: Abbreviations: Compressed spectral array (CSA), periodic epileptiform discharges (PDs), epileptiform discharges (EDs), focal slowing (FS), generalized slowing (GS) and rhythmic delta activity (RDA).

**Figure e-1: Study design.** Abbreviations: CSA = compressed spectral array, cEEG = Continuous EEG.

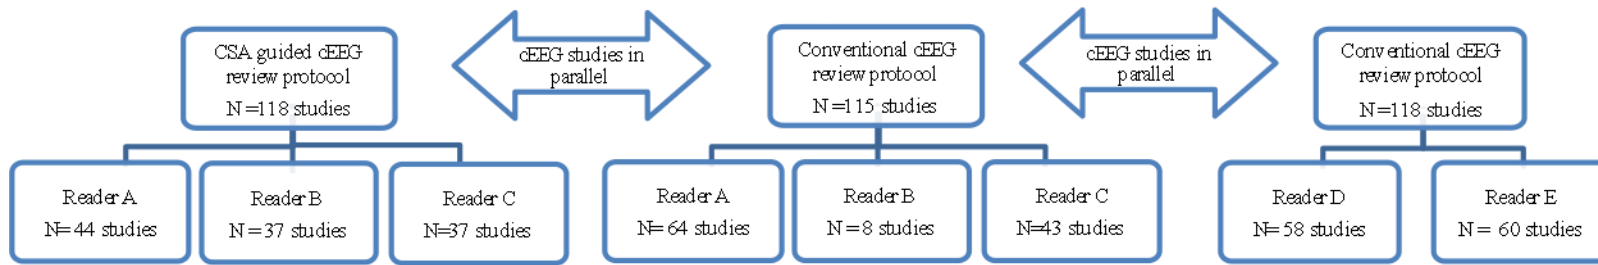

Abbreviations: CSA = compressed spectral array, cEEG = Continuous EEG.

**Figure e-2: cEEG CSA guided review workstation.**

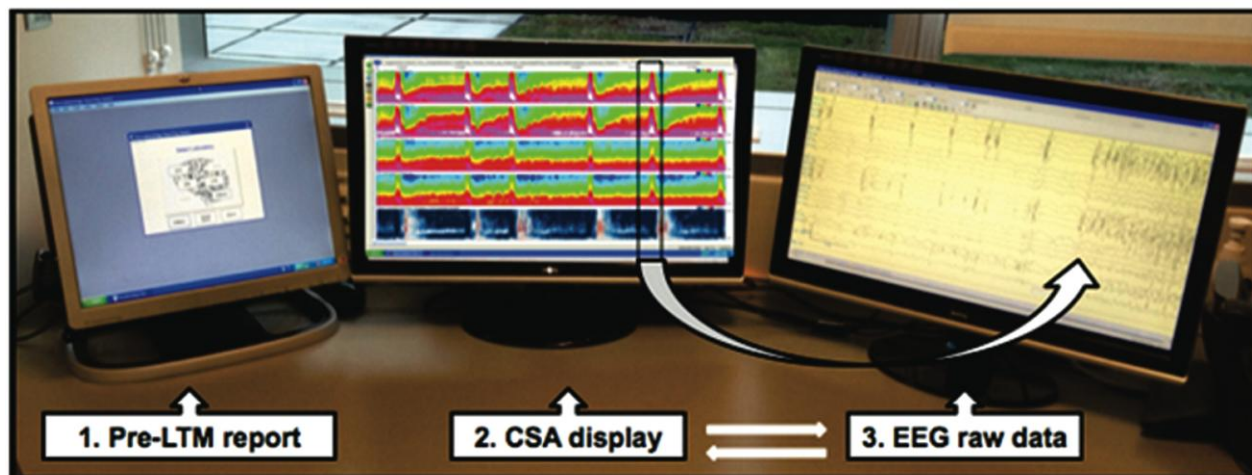

**Legend:** At each cEEG CSA guided review workstation, readers were provided three computer screens where CSA displays and EEG raw data could be reviewed simultaneously on separate monitors. 1. Pre-LTM report: cEEG file analysis began with reviewing the reported findings from the first 30 minutes of monitoring (the “pre-LTM” period of recording). 2. CSA display: The second screen shows CSA displays used to guide subsequent review of the raw data. 3. EEG raw data: Clicking anywhere within the CSA display automatically displayed a standard 10-second view of the corresponding segment of EEG for detailed review on the third monitor. *Abbreviations: CSA = compressed spectral array, pre-LTM report = Standardized report of the first 30 minutes of EEG monitoring.*
